# Supplementary material for: Predictors of Hospitalization Two Years After Treatment for First-Episode Psychosis
Source: Atypon-hosted journal article supplement (doi:10.1176/appi.ps.201200388), 2013-09-16
Supplement: 1230_ds001.pdf [file 1230_ds001.pdf]

Figure 1. Observed frequency distribution of psychiatric hospitalization in the two years following treatment in the EIPS program

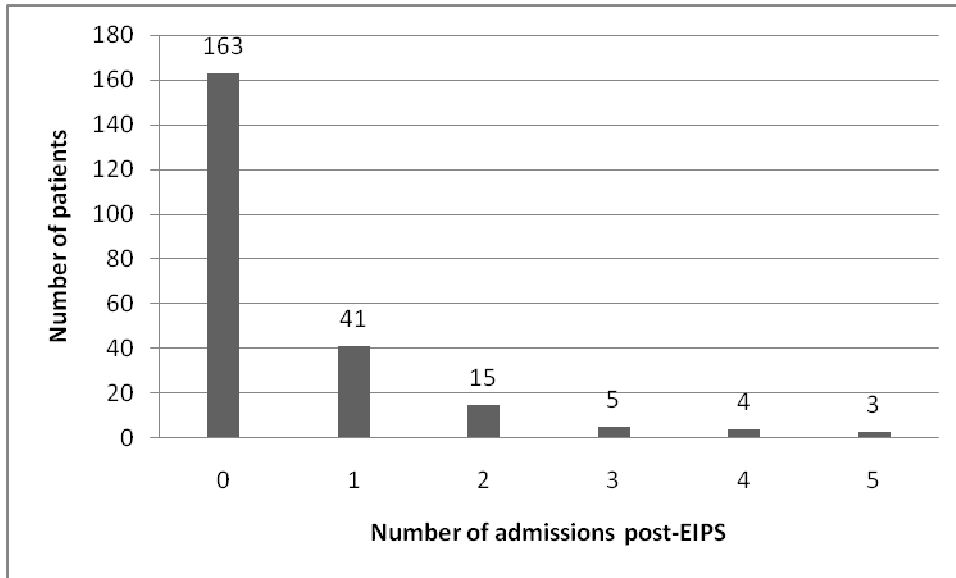

| <b>Variable</b>                           | <b>Observed N</b> |
|-------------------------------------------|-------------------|
| Gender                                    | 231               |
| Maori                                     | 231               |
| Age at referral                           | 231               |
| Domestic partnership (baseline)           | 215               |
| Without school qualifications (baseline)  | 204               |
| Schizophrenia spectrum disorder           | 231               |
| Duration of untreated illness (baseline)  | 218               |
| Pre-treatment number of days hospitalized | 231               |
| Number of days hospitalized during EIPS   | 231               |
| Number of admissions during EIPS          | 231               |
| Length of treatment in EIPS               | 231               |
| unemployed (discharge)                    | 201               |
| substance abuse (discharge)               | 198               |
| engagement                                | 202               |
| GAF score (discharge)                     | 198               |
| Honos (discharge)                         | 202               |
| Insight (baseline)                        | 219               |
| Insight (discharge)                       | 196               |
| PANSS (discharge)                         | 198               |
| QLS (discharge)                           | 199               |
